# Supplementary material
Source: PubMed Central journal article supplement (PMC5123937)
Supplement: NIHMS824349-supplement-Supp_Fig_S1-S5.pdf [file NIHMS824349-supplement-Supp_Fig_S1-S5.pdf]

## Supplemental Materials

### 3-Hydroxybutyrate Regulates Energy Metabolism and Induces BDNF Expression in Cerebral Cortical Neurons

Krisztina Marosi, Sang Woo Kim, Keelin Moehl, Morten Scheibye-Knudsen, Aiwu Cheng, Roy Cutler, Simonetta Camandola and Mark P. Mattson

## Supplemental Figures

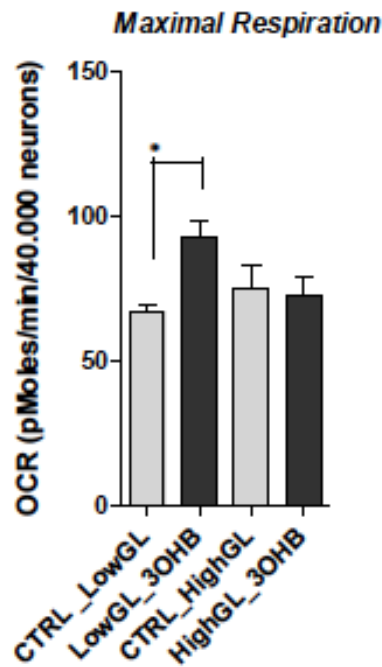

**S1. 3OHB induces mitochondrial respiration in low glucose (1mM) condition.** 3OHB (1 mM) elevated the maximal oxygen consumption rate (OCR) in the primary cortical neurons only in low glucose condition versus Low Glucose CTRL \* $p < 0.05$ .

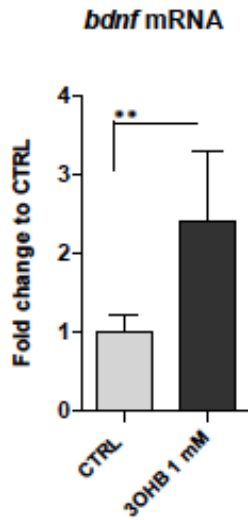

**S2. 3OHB treatment increases BDNF expression in cultured hippocampal neurons** Hippocampal neurons were incubated in medium containing a low (1 mM) concentration of glucose (GL) and were then exposed to 1 mM 3OHB or vehicle control (CTRL). Neurons were then harvested after 6 hours of 3OHB treatment for measurement of *Bdnf* mRNA levels. \*\*p<0.01.

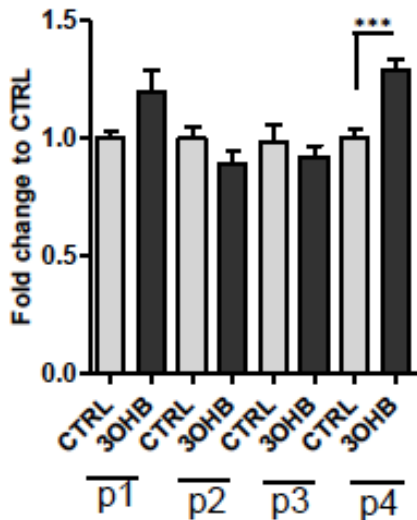

**S3. 3OHB stimulates *Bdnf* promoter IV activity.** HEK293 cells were co-transfected with *Bdnf* promoter I/II/III/IV-luciferase and pRL-TK and 24 hours later the cells were incubated in the absence

(CTRL) or presence (8 mM) for 6 h. The activities of each *Bdnf* promoters were measured as relative light units (RLU) expressed as fold change compared to the CTRL value (n = 4 separate cultures). \*\*\*p<0.001.

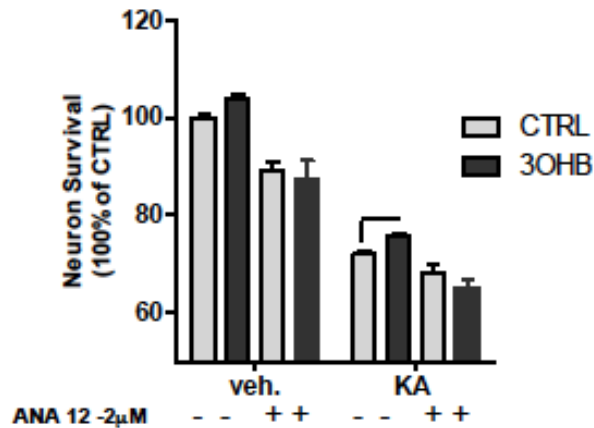

**S4. Evidence that 3OHB protects neurons against kainic acid (KA)-induced cell death by mechanism that involves *Bdnf*.** Cortical neurons incubated with without (CTRL) or with 8 mM 3OHB for 6 hours in the presence and the absence of TrkB inhibitor (ANA-12, 2 μM) then exposed to 100 μM kainic acid for 24 hours. 3OHB slightly prevented the KA-induced neuronal death. The protective effect of 3OHB was abolished in the presence of TrkB inhibitor (n = 3 separate cultures). \*p<0.05.

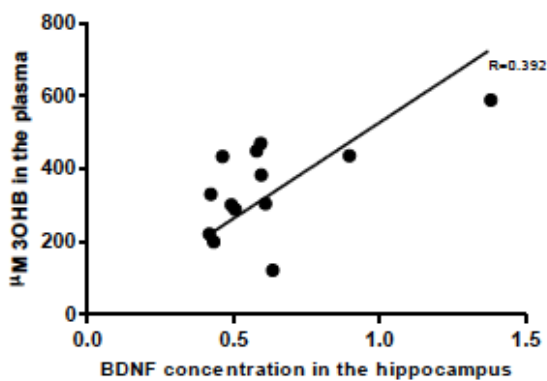

**S5. Plasma BDNF and 3OHB levels in sedentary and trained mice** There was a significant correlation between the circulating levels in the 3OHB and the hippocampal BDNF levels R=0.392.
